# Supplementary material for: Blood sampling for metanephrines comparing venipuncture vs. indwelling intravenous cannula in healthy subjects
Source: publisher site journal article supplement (doi:10.1515/cclm-2020-0022), 2020-04-22
Supplement: Supplementary file 2 [file cclm-2020-0022_suppl.docx]

**Supplemental files**

| *ID* | *MN i.v. cannula (nmol/L)* | *MN venipuncture (nmol/L)* | *Difference (∆) MN venipuncture - iv cannula (nmol/L)* | *Difference (∆) MN venipuncture- iv cannula %* | *NMN i.v. cannula (nmol/L)* | *NMN venipuncture (nmol/L)* | *Difference (∆) NMN venipuncture- iv cannula (nmol/L)* | *Difference (∆) NMN venipuncture- iv cannula %* |
| --- | --- | --- | --- | --- | --- | --- | --- | --- |
| 1 | 0.109 | 0.091 | -0.018 | -16.51 | 0.322 | 0.425 | 0.103 | 31.99 |
| 2 | 0.247 | 0.223 | -0.024 | -9.72 | 0.465 | 0.627 | 0.162 | 34.84 |
| 3 | 0.147 | 0.125 | -0.022 | -14.97 | 0.453 | 0.470 | 0.017 | 3.75 |
| 4 | 0.102 | 0.134 | 0.032 | 31.37 | 0.246 | 0.297 | 0.051 | 20.73 |
| 5 | 0.203 | 0.231 | 0.028 | 13,79 | 0.273 | 0.354 | 0.081 | 29.67 |
| 6 | 0.133 | 0.192 | 0.059 | 44.36 | 0.392 | 0.399 | 0.007 | 1.79 |
| 7 | 0.060 | 0.073 | 0.013 | 21.67 | 0.329 | 0.315 | -0.014 | -4.26 |
| 8 | 0.136 | 0.125 | -0.011 | -8.09 | 0.228 | 0.205 | -0.023 | -10.09 |
| 9 | 0.152 | 0.185 | 0.033 | 21.71 | 0.216 | 0.216 | 0.000 | 0.00 |
| 10 | 0.083 | 0.105 | 0.022 | 26.51 | 0.299 | 0.374 | 0.075 | 25.08 |
| 11 | 0.142 | 0.158 | 0.016 | 11.27 | 0.418 | 0.394 | -0.024 | -5.74 |
| 12 | 0.102 | 0.137 | 0.035 | 34.31 | 0.486 | 0.532 | 0.046 | 9.47 |
| 13 | 0.087 | 0.092 | 0.005 | 5.75 | 0.357 | 0.416 | 0.059 | 16.53 |
| 14 | 0.093 | 0.111 | 0.018 | 19.35 | 0.330 | 0.332 | 0.002 | 0.61 |
| 15 | 0.084 | 0.139 | 0.055 | 65.48 | 0.225 | 0.415 | 0.190 | 84.44 |
| 16 | 0.173 | 0.187 | 0.014 | 8.09 | 0.252 | 0.272 | 0.020 | 7.94 |
| 17 | 0.086 | 0.160 | 0.074 | 86.05 | 0.305 | 0.259 | -0.046 | -15.08 |
| 18 | 0.093 | 0.117 | 0.024 | 25.81 | 0.374 | 0.329 | -0.045 | -12.03 |
| 19 | 0.183 | 0.182 | -0.001 | -0.55 | 0.420 | 0.430 | 0.010 | 2.38 |
| 20 | 0.171 | 0.236 | 0.065 | 38.01 | 0.374 | 0.472 | 0.098 | 26.20 |
| 21 | 0.133 | 0.206 | 0.073 | 54.89 | 0.458 | 0.483 | 0.025 | 5.46 |
| 22 | 0.166 | 0.149 | -0.017 | -10.24 | 0.426 | 0.429 | 0.003 | 0.70 |

**Supplemental file 1** Individual results of the plasma concentrations of metanephrines with both sampling methods, i.e. collection through intravenous cannula and via venipuncture.
Abbreviations: MN; metanephrines, NMN; normetanephrines, i.v.; intravenous
